# Supplementary material
Source: PubMed Central journal article supplement (PMC2034253)

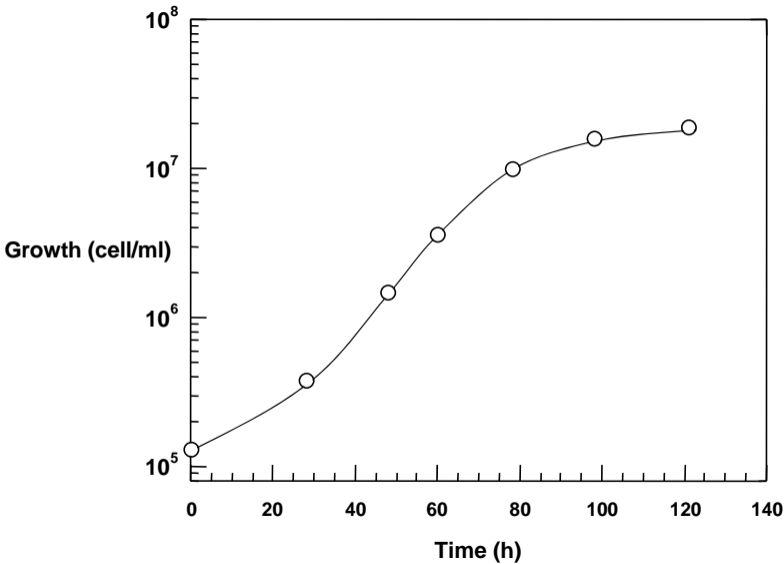

Supplement: pnas_0706847104_2.pdf [file pnas_0706847104_2.pdf]

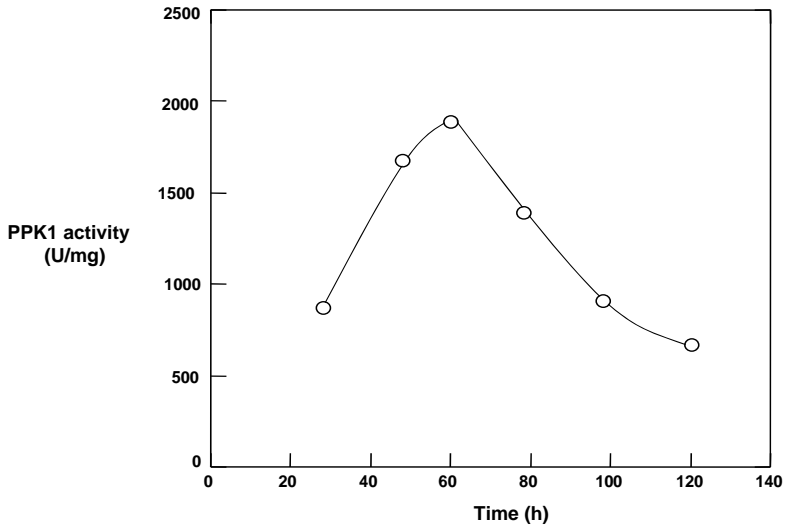

Supplement: pnas_0706847104_3.pdf [file pnas_0706847104_3.pdf]

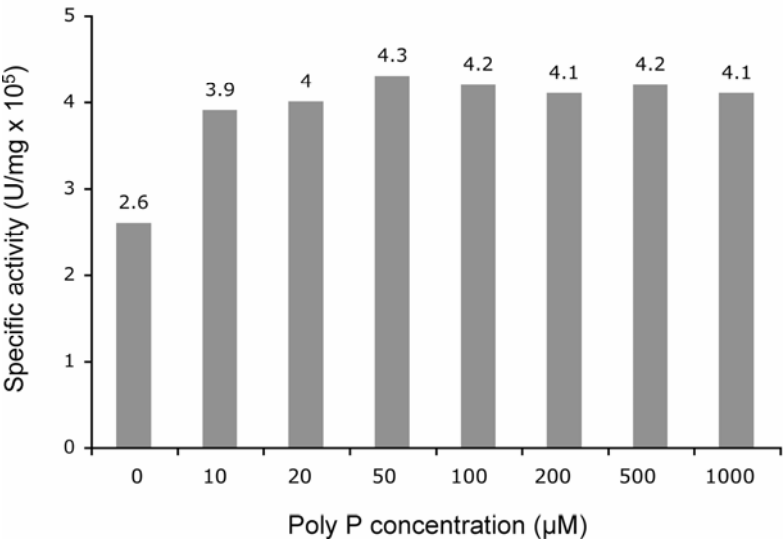

Supplement: pnas_0706847104_4.pdf [file pnas_0706847104_4.pdf]

**A**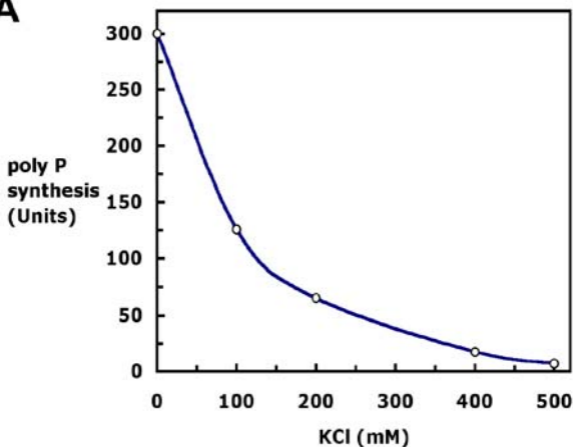**B**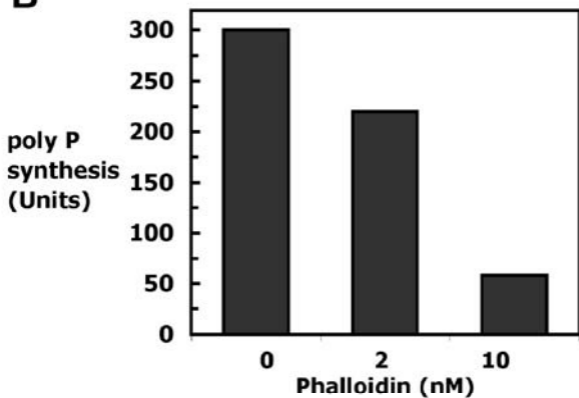**C**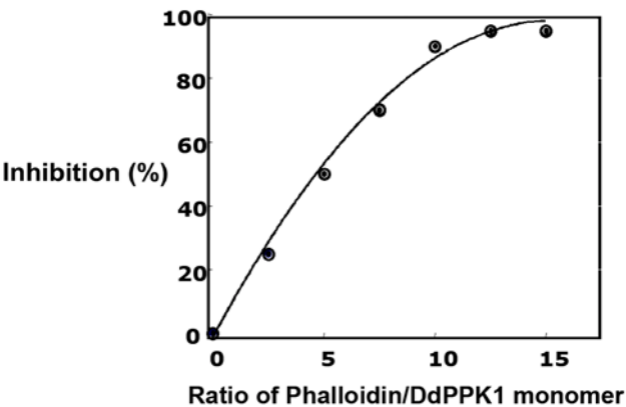

Supplement: pnas_0706847104_5.pdf [file pnas_0706847104_5.pdf]
